# Supplementary material
Source: PubMed Central journal article supplement (PMC7839972)
Supplement: NIHMS1651776-supplement-1.pdf [file NIHMS1651776-supplement-1.pdf]

## Supplementary figures

### Scatterplot matrix of pairwise log-ratios of artificial 3-part compositions

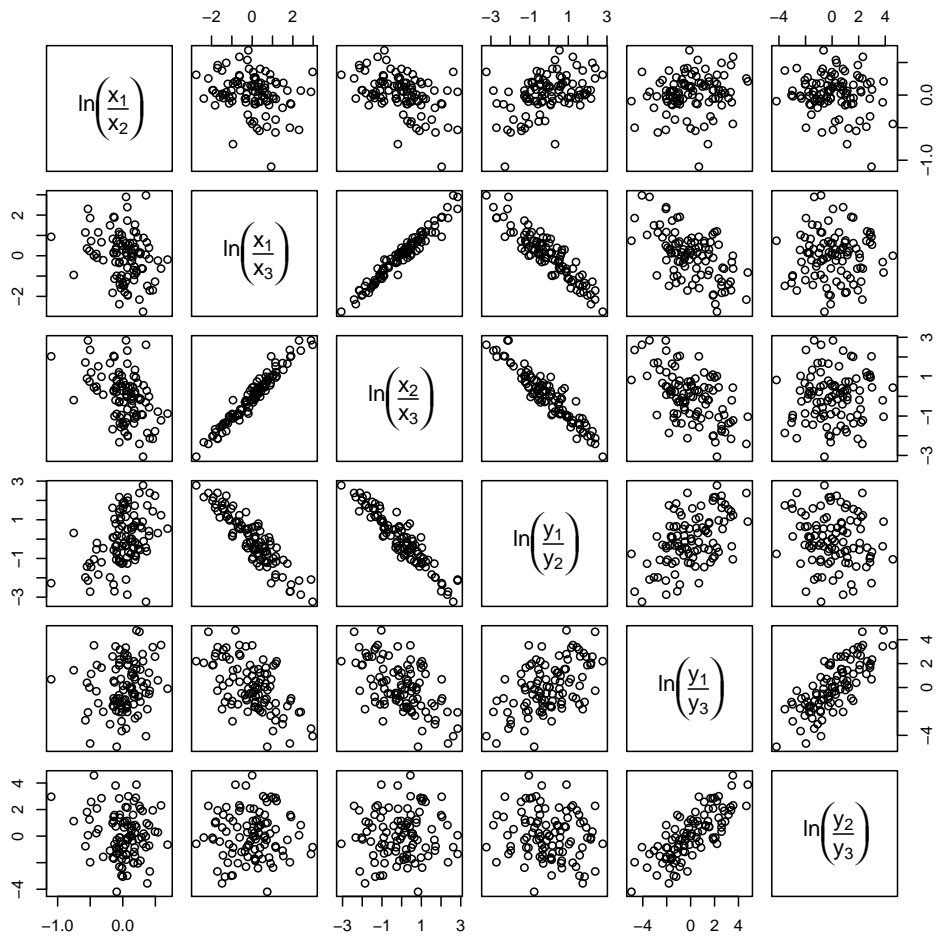

Figure S1: Scatterplot matrix of all log-ratios of two compositions of three parts.

## Results of permutation test for European floodplain sediments

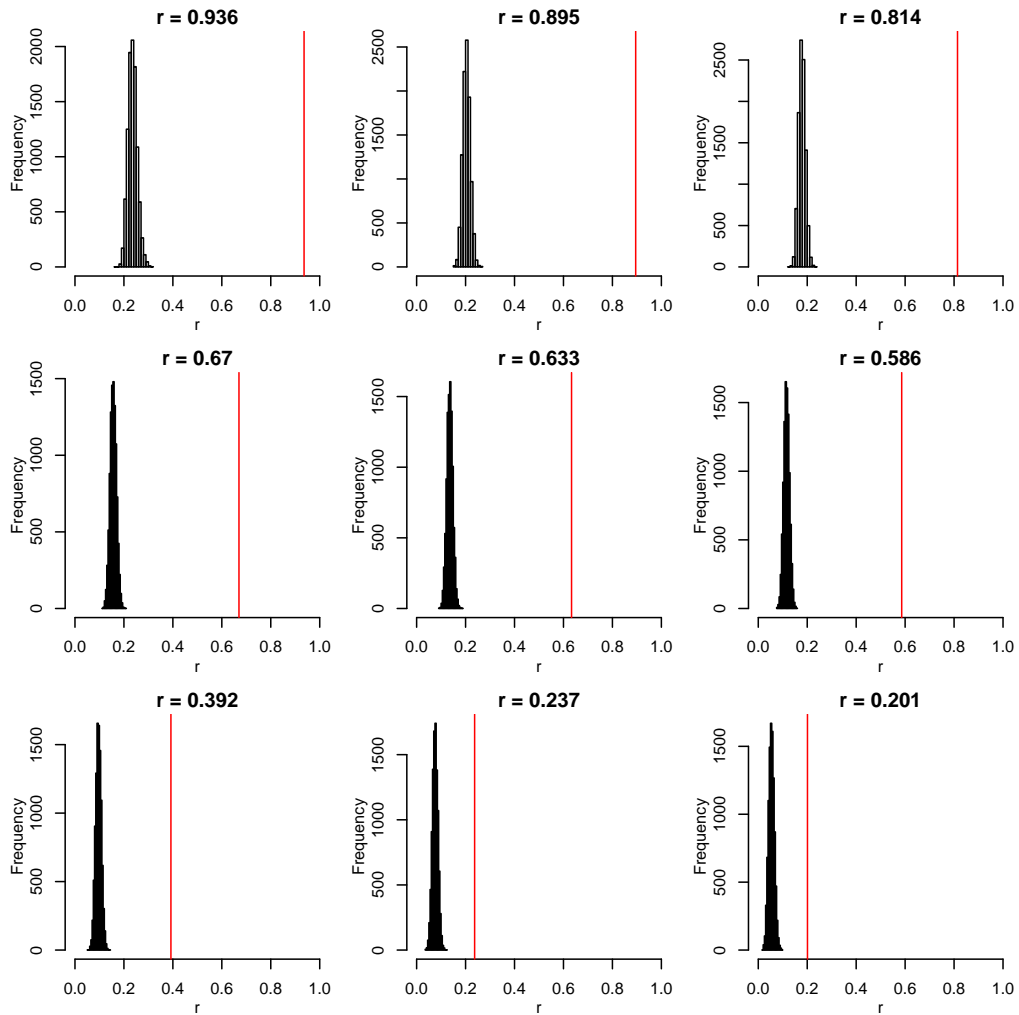

Figure S2: Permutation test of nine canonical correlations obtained in a CoDA-CCO of oxides and trace elements of European floodplain sediments. Histograms show the distribution of the canonical correlation obtained in 10,000 permutations of the data. The vertical red line indicates the observed sample canonical correlation.

# Scatterplot matrix of selected pairwise log-ratios for European floodplain sediments.

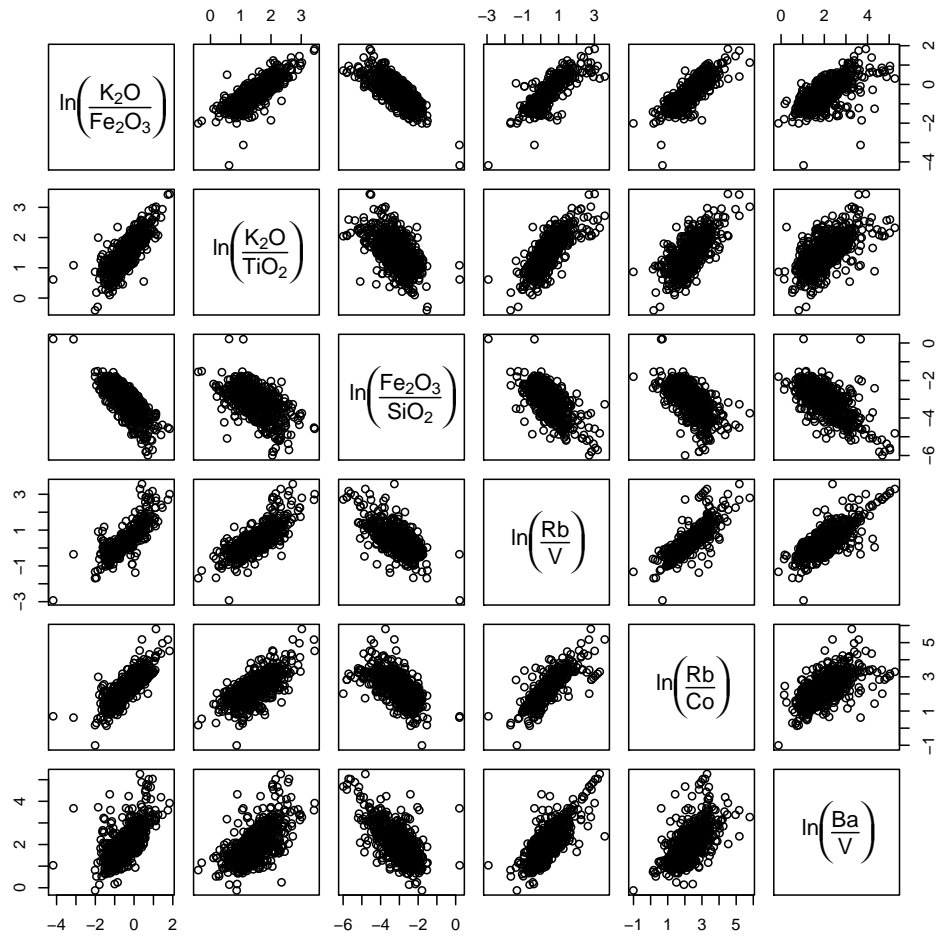

Figure S3: Scatterplot matrix of log-ratios of major oxides and trace elements of European floodplain sediments related to the first canonical variate.

## Biplot enhanced with samples for European floodplain sediments.

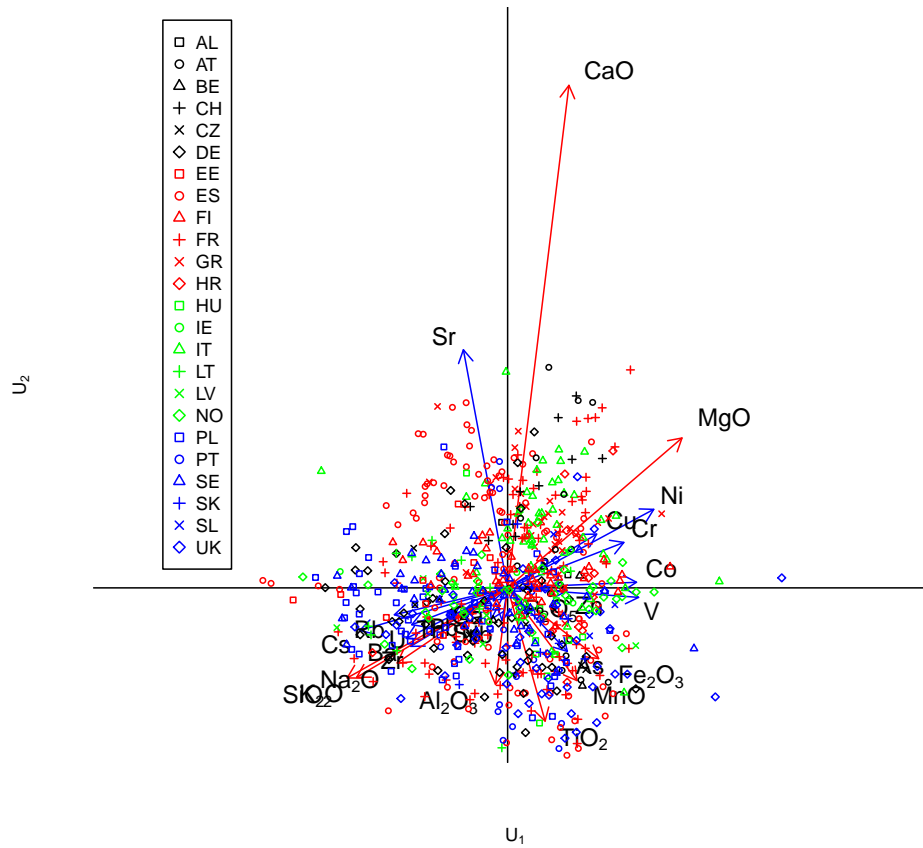

Figure S4: Biplot of CoDA-CCO of major oxides and trace elements of European floodplain sediments, with added samples. Symbols and colour are used to indicate country of origin.

## Geospatial map of canonical variates for European floodplain sediments.

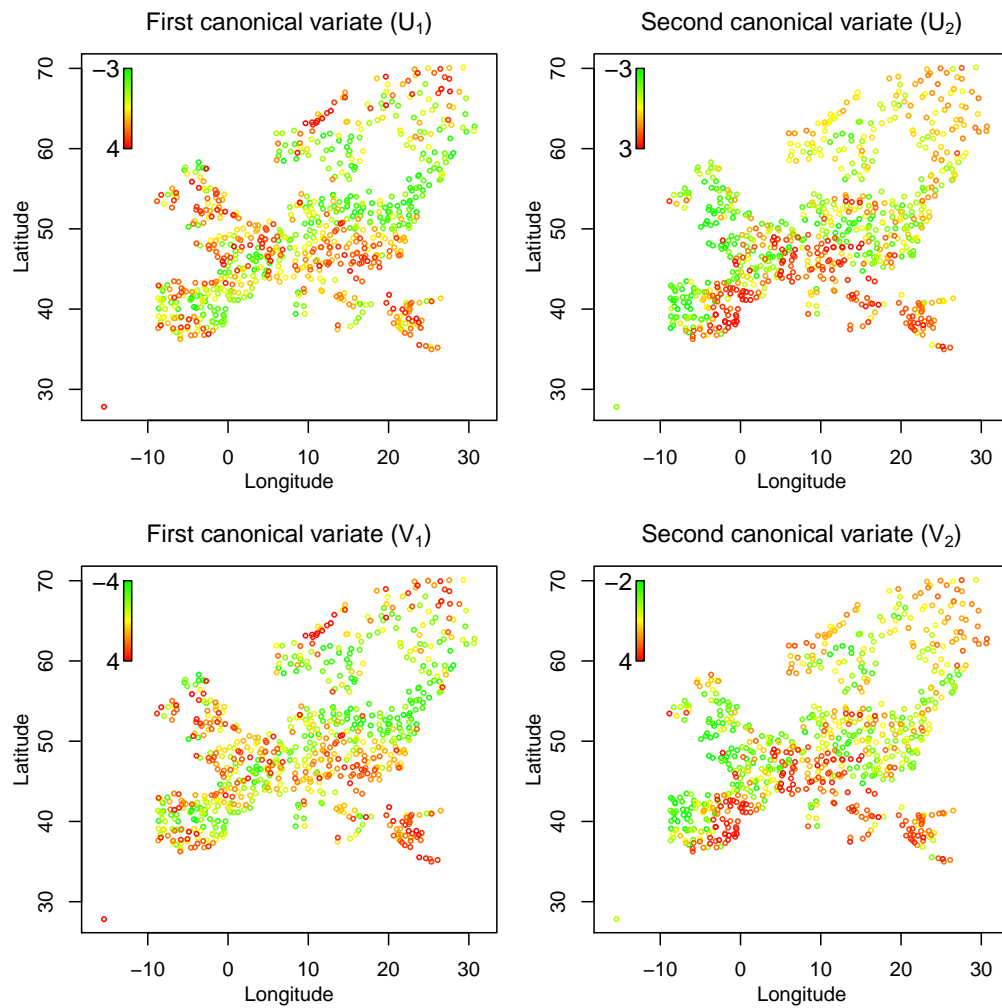

Figure S5: Geographical map of the samples, coloured according to the values of the canonical variates of oxides ( $U_1$  and  $U_2$ ) and traces ( $V_1$  and  $V_2$ ).
